# Supplementary material
Source: ML conference proceedings conference paper supplement (https://openreview.net/forum?id=166b5z77Io)
Supplement: supplementary_material [file attachment]

# Common Issues in Previous FLARE Paper Submissions

**Please avoid these issues in your paper.  
If the paper still has these issues, it will be directly rejected!**

Submission website:

<https://openreview.net/group?id=MICCAI.org/2023/FLARE>

# Please create your own figure and do not copy the template figure!

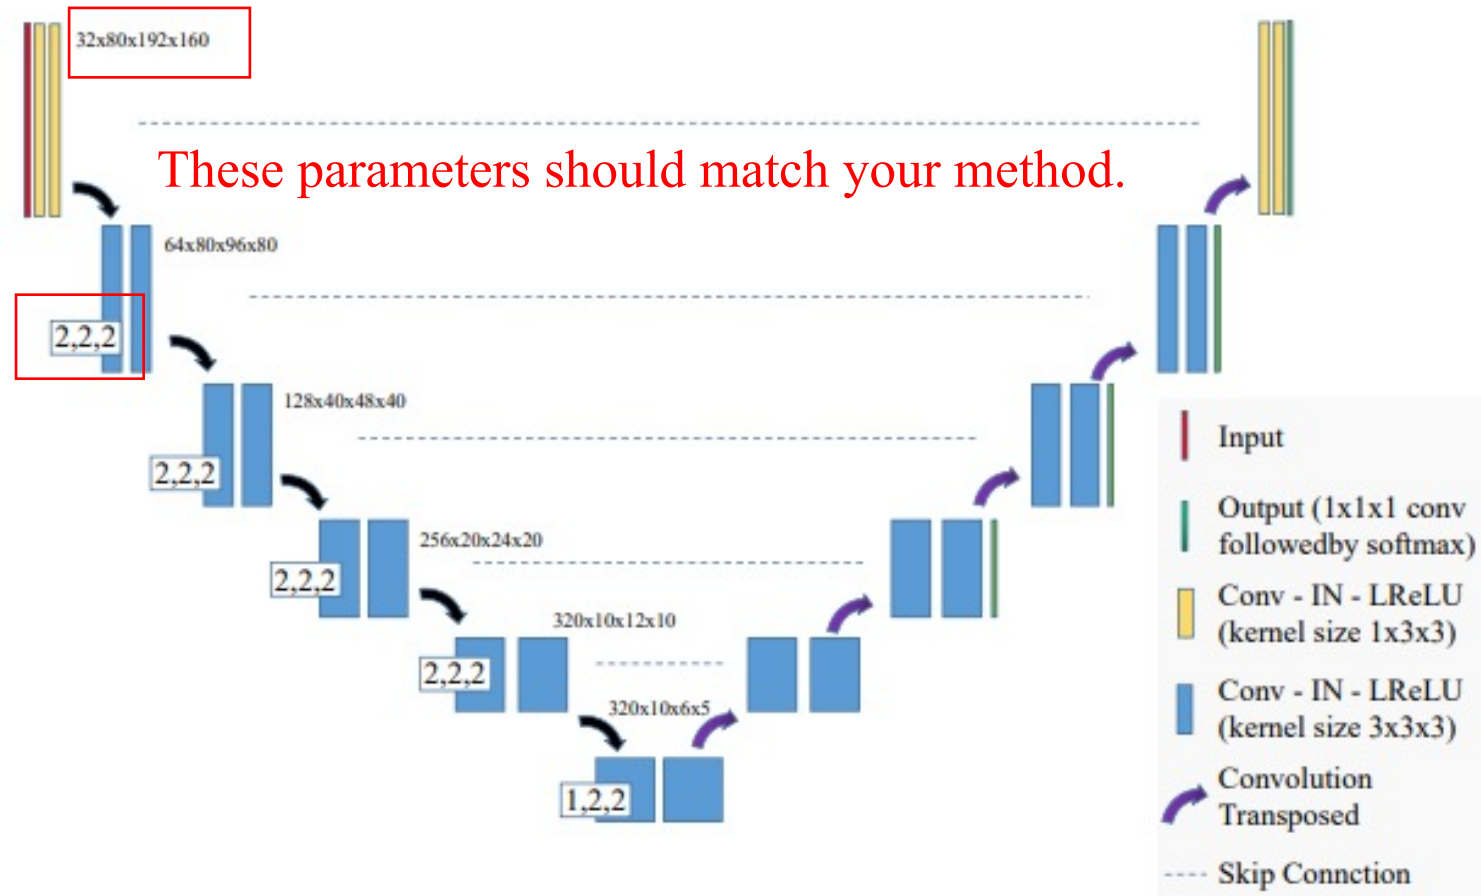

Fig. 1: 3D u-net as implemented in the nnU-Net framework.

Should be U-Net

Please add explanation of your network😊

# Please create high-resolution figures

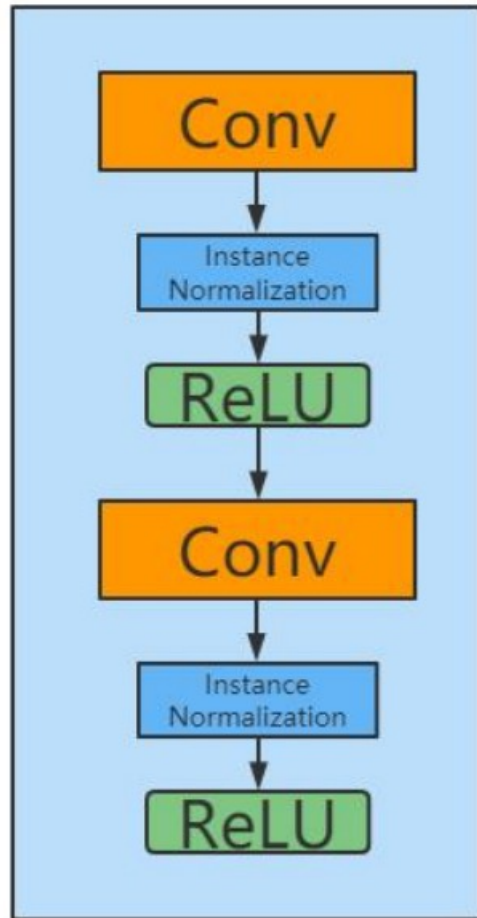

a) Encoding block

Resolution is low

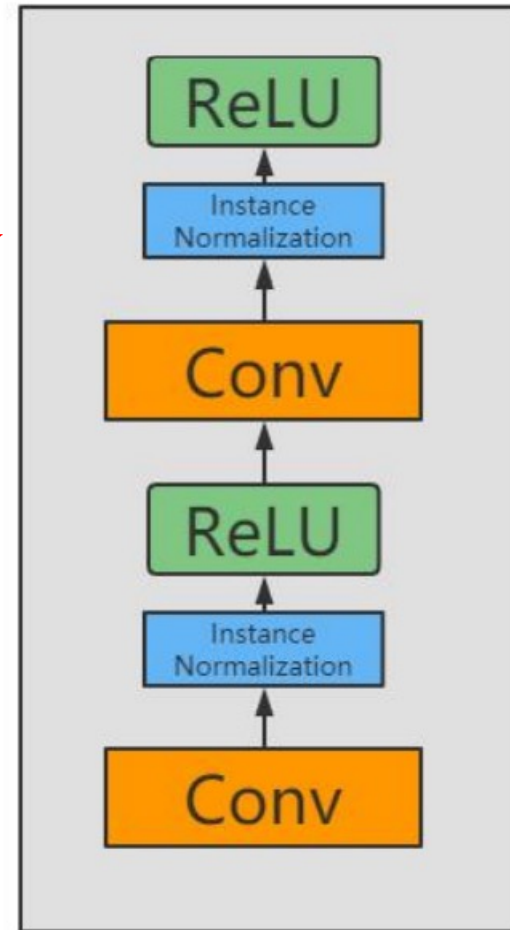

b) Decoding block

Please add explanation of your network block☺

# Figure is too small

## 2 Method

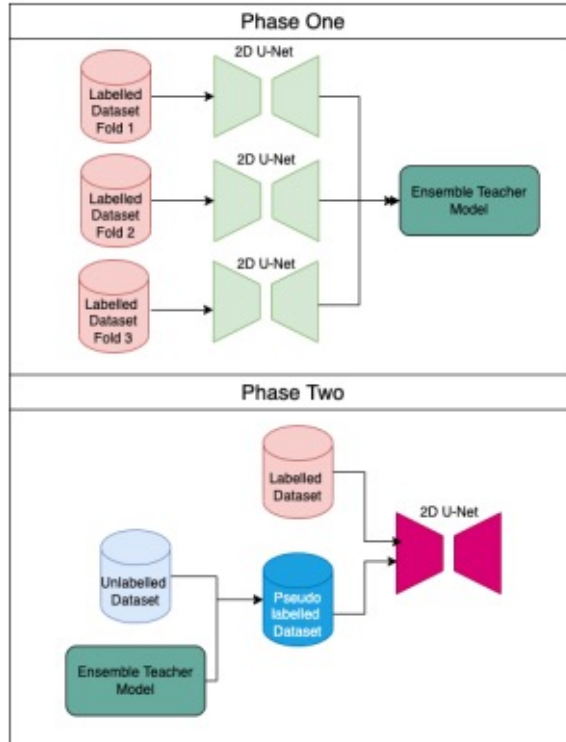

Fig. 1. Two-Phase Approach

There is still room to zoom in the image.

Please add explanation of your network block😊

# Common Table Issues

Table 1: Development environments and requirements.

|                         |                                                    |
|-------------------------|----------------------------------------------------|
| Ubuntu version          | 20.04                                              |
| CPU                     | Intel(R) Xeon(R) Gold 6152 CPU @ 2.10GHz (9 cores) |
| RAM                     | 30GB                                               |
| GPU (number and type)   | 1 NVIDIA GPU with at least 11G VRAM                |
| CUDA version            | 11.3 with cudnn 8                                  |
| Programming language    | Python 3.9                                         |
| Deep learning framework | PyTorch (Torch 1.11, torchvision 0.12, apex 0.1)   |
| Specific dependencies   | nnunet                                             |

Please specify the GPU name, e.g., 1 NVIDIA  
2080Ti (11G)

# Common Table Issues

Table 2: Training protocol

|                            |                                             |
|----------------------------|---------------------------------------------|
| Network initialization     | “he” normal initialization                  |
| Batch size                 | 2                                           |
| Patch size                 | $40 \times 224 \times 192$                  |
| Total epochs               | 1000                                        |
| Optimizer                  | SGD with nesterov momentum ( $\mu = 0.99$ ) |
| Initial learning rate (lr) | 0.01                                        |
| Lr decay schedule          | Exponentially decaying (poly lr)            |
| Training time              | 40 hours per fold, per iteration            |

Please present total training time

# Common Table Issues

Table 5: Ablation study for inference step size and test-time augmentation.

| Step size | TTA | DSC      | GPU time (s) |
|-----------|-----|----------|--------------|
| 0.9       | no  | 0.8848   | 56           |
| 0.9       | yes | 0.8860   | 102          |
| 0.5       | no  | 0.0.8663 | 129          |
| 0.5       | yes | 0.8874   | 284          |

Horizontal line is missed.

|                               |                                                 |
|-------------------------------|-------------------------------------------------|
| Network initialization        | Kaiming Uniform [6]                             |
| Batch size*                   | 4                                               |
| Gradient Accumulation Batches | 64                                              |
| Patch size                    | 128 × 128 × 64                                  |
| Total epochs                  | 100                                             |
| Optimizer                     | Adam [11] with betas=(0.9, 0.999)               |
| Initial learning rate (LR)    | 0.01                                            |
| Lr decay schedule             | ReduceLROnPlateau with the patience of 3 epochs |
| Training time                 | 6.678 hours                                     |
| Number of model parameters    | 637,425                                         |
| Number of flops               | 7.156G                                          |

Table 3: Hyperparamenters for Abdomen Region Segmentor

Table Title should be on top.

Figure Title should be on bottom.



# Common Table Issues

**Table 3.** Ablation of semi-supervised learning (SSL). LV, RK, SL, PC, AT, IVC, RAG, LAG, GB, EH, SM, DD, and LK are short for Liver, Right Kidney, Spleen, Pancreas, Aorta, Inferior Vena Cava, Right Adrenal Gland, Left Adrenal Gland, Gallbladder, Esophagus, Stomach, and Left kidney, respectively.

| Method             | Mean         | LV    | RK    | SL    | PC    | AT    | IVC   | RAG   | LAG   | GB    | EH    | SM    | DD    | LK    |
|--------------------|--------------|-------|-------|-------|-------|-------|-------|-------|-------|-------|-------|-------|-------|-------|
| nnU-Net w/o SSL    | 0.869        | 0.967 | 0.880 | 0.941 | 0.841 | 0.949 | 0.882 | 0.822 | 0.819 | 0.821 | 0.877 | 0.885 | 0.748 | 0.871 |
| nnU-Net w SSL      | <b>0.895</b> | 0.978 | 0.897 | 0.973 | 0.909 | 0.973 | 0.922 | 0.839 | 0.826 | 0.779 | 0.900 | 0.914 | 0.838 | 0.888 |
| Light UNet w/o SSL | 0.837        | 0.965 | 0.869 | 0.932 | 0.830 | 0.945 | 0.860 | 0.766 | 0.731 | 0.731 | 0.837 | 0.858 | 0.717 | 0.843 |
| Light UNet w SSL   | <b>0.878</b> | 0.976 | 0.910 | 0.969 | 0.894 | 0.960 | 0.896 | 0.807 | 0.763 | 0.764 | 0.865 | 0.915 | 0.799 | 0.891 |

Please do not exceed the default layout.  
You can present the results in multiple rows or vertically display it.



# Common Figure Issues

Font: Times New Roman

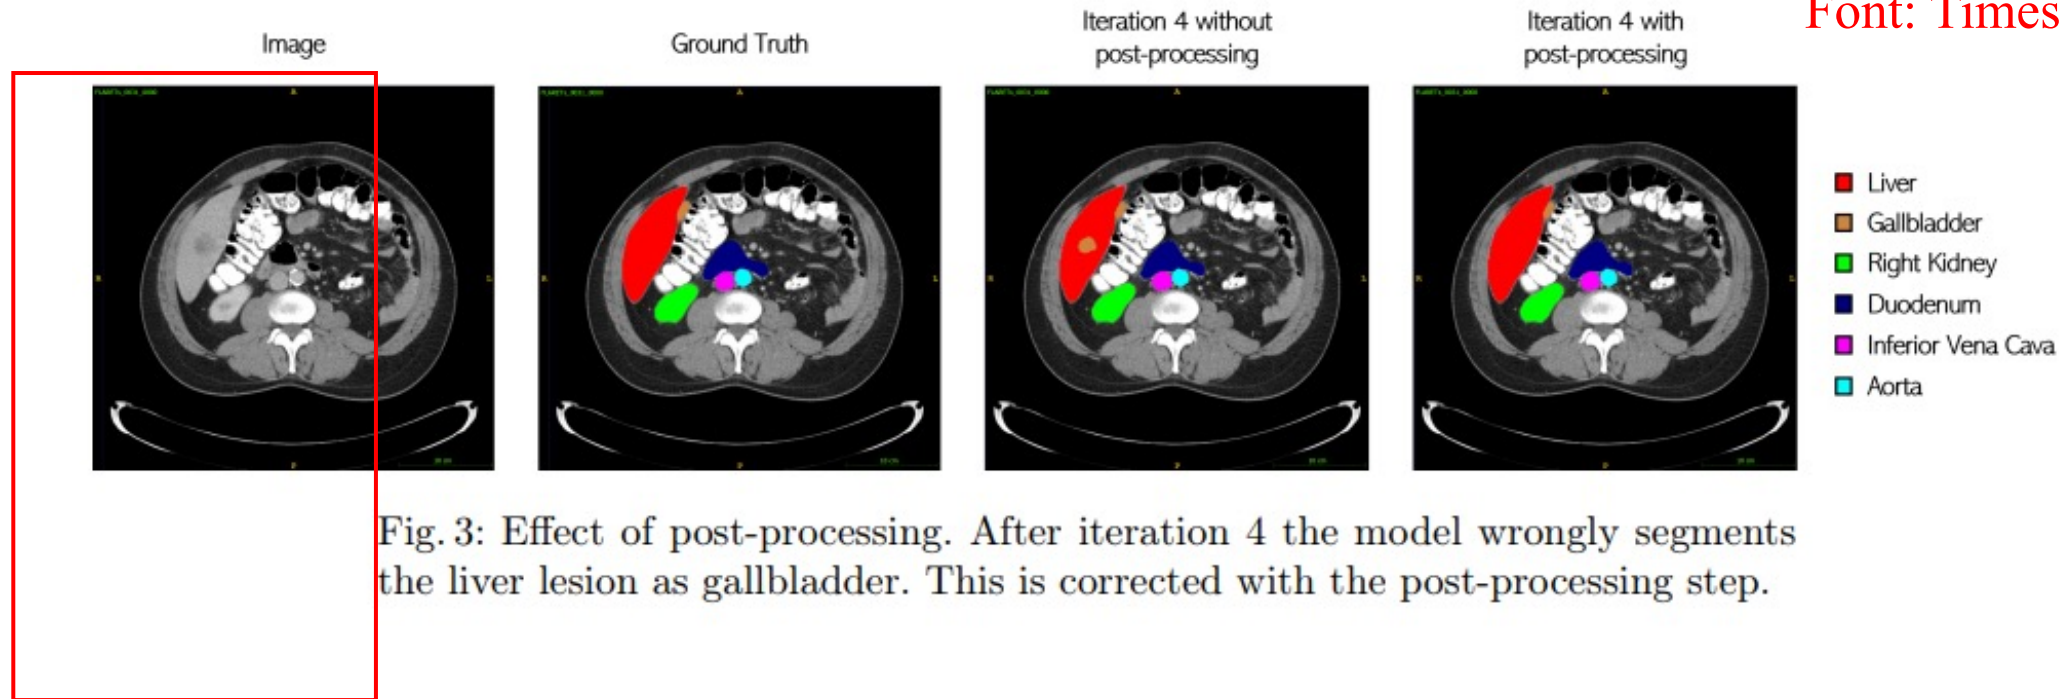

Please do not exceed the default layout.

Just 42. Please remove “”

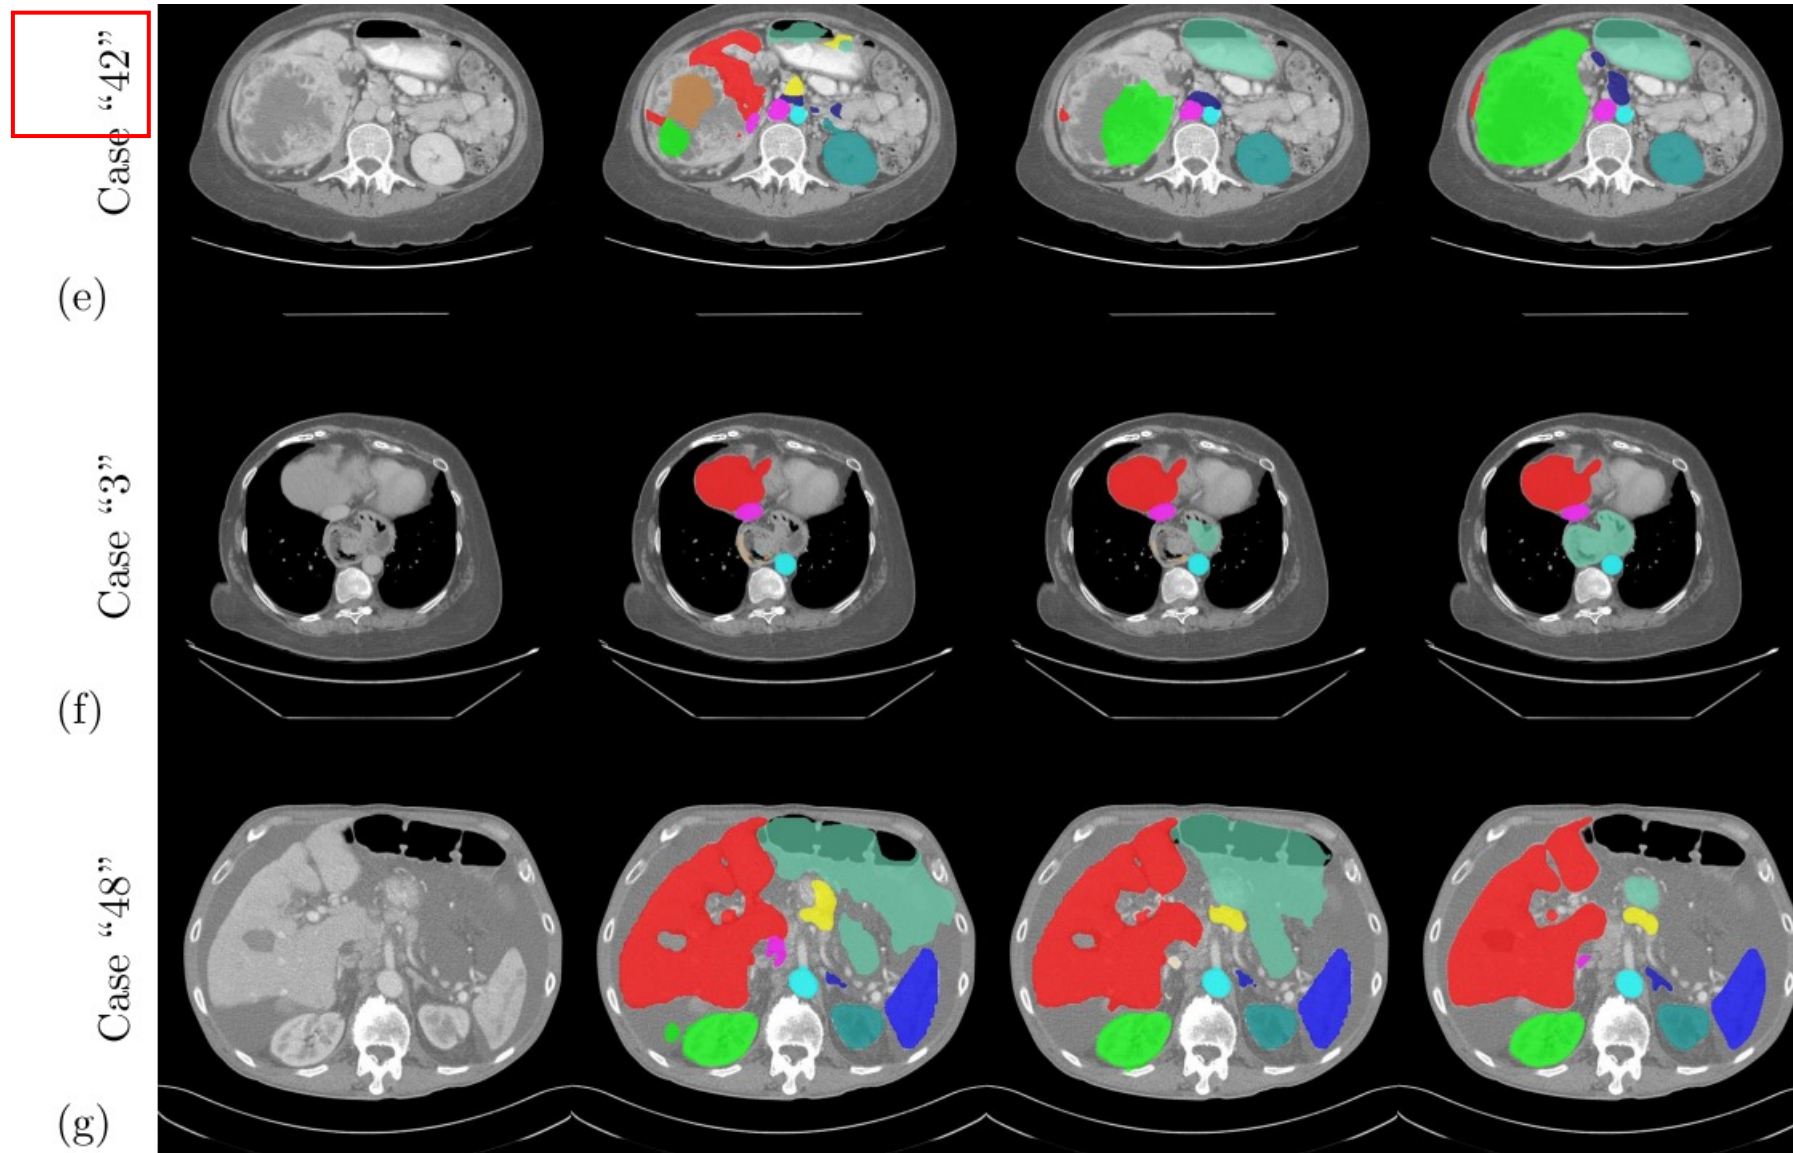

Images are not clear. Please adjust the window level and width to 40, 400, respectively.

# Common Figure Issues

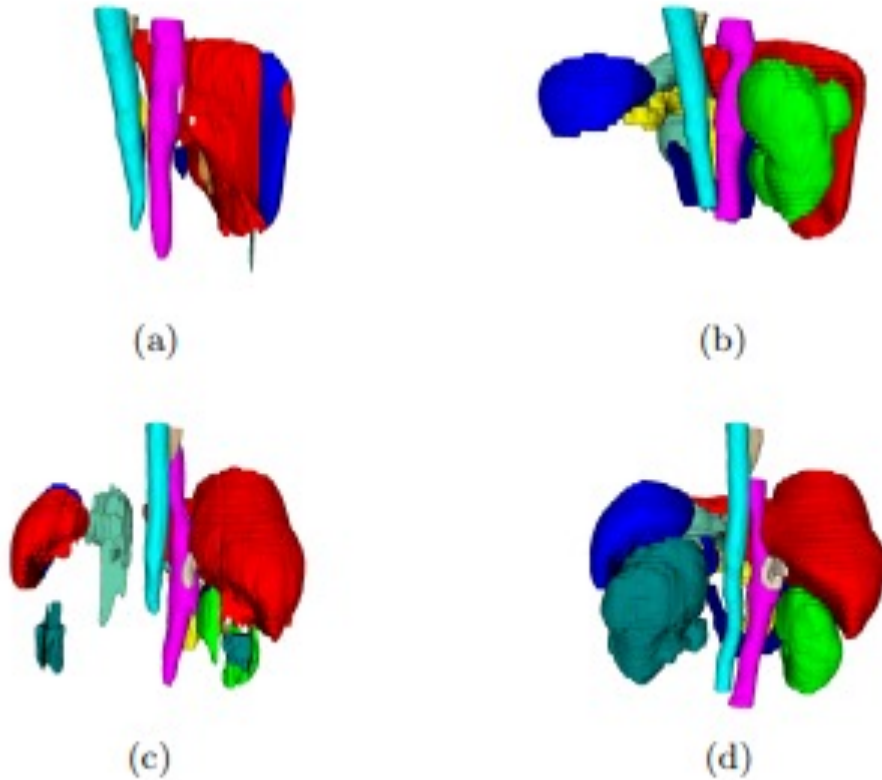

Please show examples in axial slices as well, not just show 3D results.  
If the space is not enough, please only keep the segmentation results of axial slices (similar to the example in page 15).

**Fig. 4.** Some bad predicted results on the validation set and their corresponding labels. In the figure, a and c are the predicted result, and b and d are the original labels corresponding to a and c respectively.

# Common Figure Issues

The organs are too small while the black background is large. Please zoom in the organs.

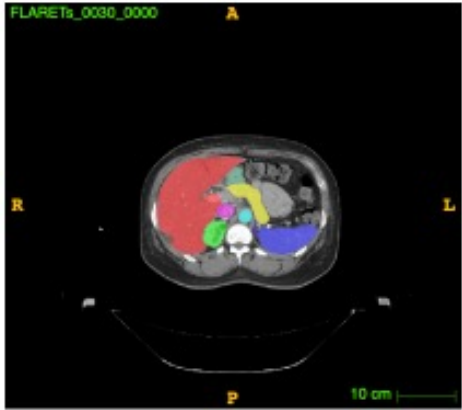

(a) Coronal Plane-GT

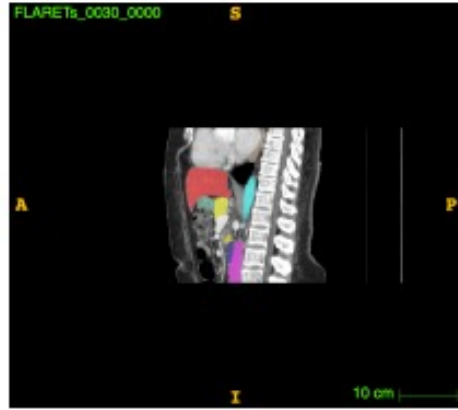

(b) Sagittal Plane-GT

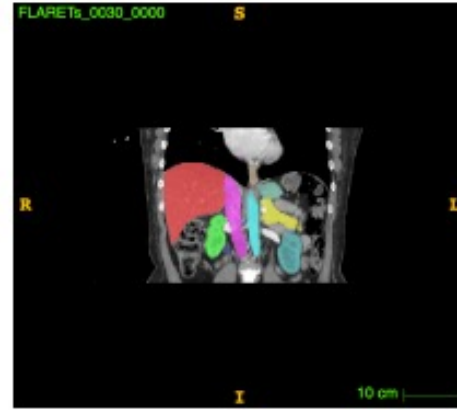

(c) Transverse Plane-GT

Here is a geate example to show the segmentation result. Please mark the case name and slice number

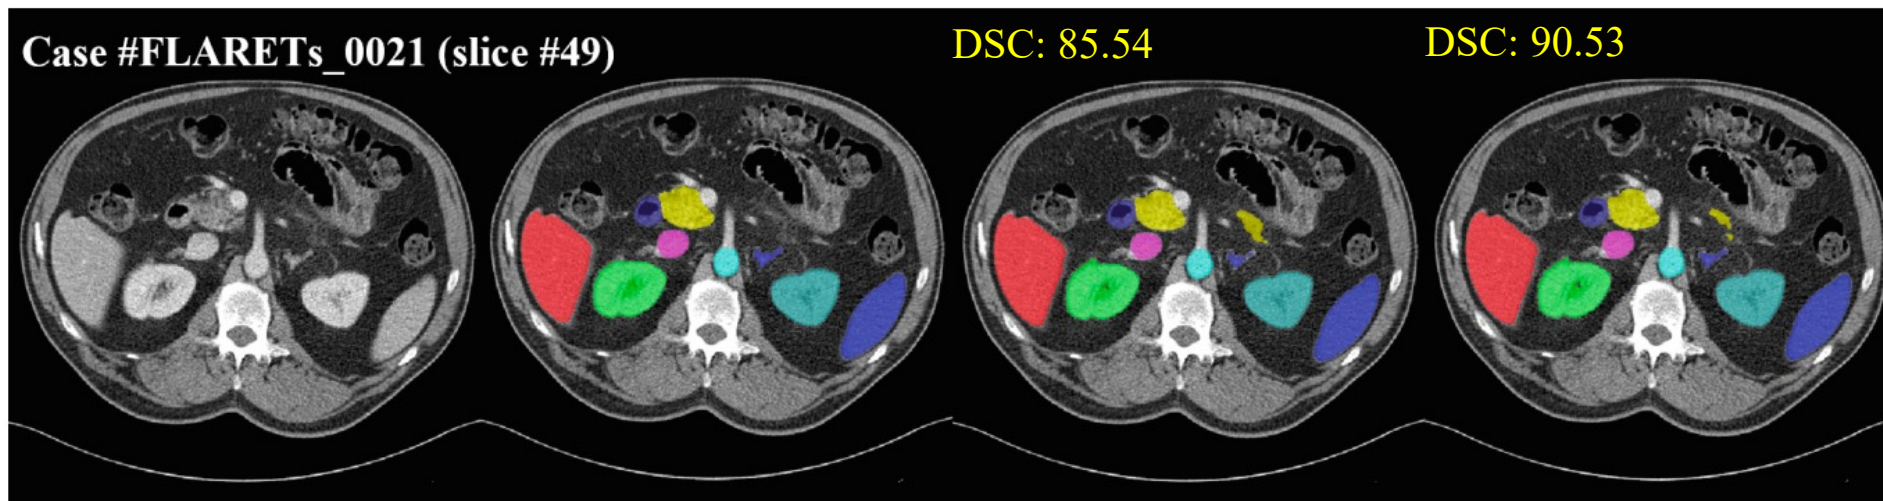



# Common Figure Issues

x-axis label and y-axis label are missed. Sub-figures are too small. Please zoom in them. If you do not have enough space, please put them in the supplementary.

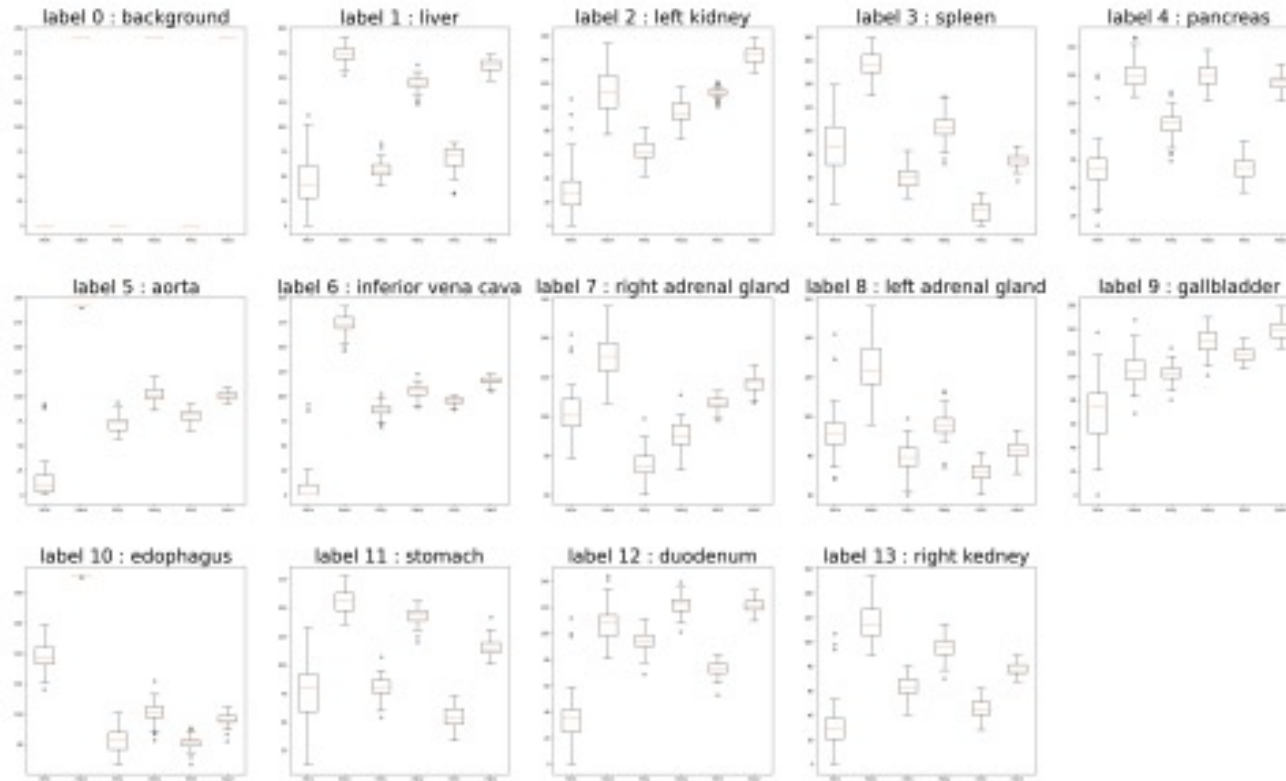

**Fig. 2.** Labels location statistics

# Reference format should be consistent.

## Two examples for journal and conference papers

```
122 @article{TCIA,  
123   title={The Cancer Imaging Archive (TCIA): maintaining and operating a public  
124     information repository},  
125   author={Clark, Ken and Vendt, Bruce and Smith, Kirk and Freymann, John and  
126     Kirby, Justin and Koppel, Paul and Moore, Stephen and Phillips, Stephen and  
127     Maffitt, Derek and Pringle, Michael and Tarbox, Lawrence and Prior, Fred},  
128   journal={Journal of Digital Imaging},  
129   volume={26},  
130   number={6},  
131   pages={1045--1057},  
132   year={2013}  
133 }
```

Key words should be capital.

Wrong example: Journal of digital imaging;

```
132 @inproceedings{ITKSNAP,  
133   title={ITK-SNAP: An interactive tool for semi-automatic segmentation of multi-  
134     modality biomedical images},  
135   author={Yushkevich, Paul A and Gao, Yang and Gerig, Guido},  
136   booktitle={Annual International Conference of the IEEE Engineering in Medicine  
137     and Biology Society},  
138   pages={3342--3345},  
139   year={2016}  
140 }
```

Key words should be capital.

Don't add 34<sup>th</sup> and conference abbreviation

Journal paper should include title, author, journal name, volume, number, pages, and year.

Proceeding should include title, author, booktitle, pages, and year. (Optional: publisher)

“Month” is not needed.

Please present the full name for conference. Don't use abbreviation e.g., CVPR, MICCAI



# Other Notes

- Please use the official template. We only accept latex format for publication.  
<https://www.overleaf.com/read/cfnjxkkqyfrf>
- Include detailed **Affiliations, Email-Addresses, and ORCID** in the first page
- **Mark the corresponding author.**
- The font should be **Times New Roman** in figures.
- Please describe all the **data augmentations** you used
- Please describe **your strategies to improve the segmentation efficiency** (GPU consumption and running time) in Sec 2. If you do not have any design, please explicitly describe that. E.g., we do not optimize the segmentation efficiency.
- **Ablation study** results should be presented in Sec 4.1 and 4.2.
- **Checklist Table MUST** be included in the manuscript

## Minors:

- “figure”-> Fig. (The same as the Figure identifier)
- “table”-> Table
- “u-net”->U-Net

# Checklist Table **MUST** be included in the manuscript

**Table 6.** Checklist Table. Please fill out this checklist table in the answer column.

| Requirements                                                                            | Answer        |
|-----------------------------------------------------------------------------------------|---------------|
| A meaningful title                                                                      | Yes/No        |
| The number of authors ( $\leq 6$ )                                                      | Number        |
| Author affiliations, Email, and ORCID                                                   | Yes/No        |
| Corresponding author is marked                                                          | Yes/No        |
| Validation scores are presented in the abstract                                         | Yes/No        |
| Introduction includes at least three parts:<br>background, related work, and motivation | Yes/No        |
| A pipeline/network figure is provided                                                   | Figure number |
| Pre-processing                                                                          | Page number   |
| Strategies to use the partial label                                                     | Page number   |
| Strategies to use the unlabeled images.                                                 | Page number   |
| Strategies to improve model inference                                                   | Page number   |
| Post-processing                                                                         | Page number   |
| Dataset and evaluation metric section is presented                                      | Page number   |
| Environment setting table is provided                                                   | Table number  |
| Training protocol table is provided                                                     | Table number  |
| Ablation study                                                                          | Page number   |
| Efficiency evaluation results are provided                                              | Table number  |
| Visualized segmentation example is provided                                             | Figure number |
| Limitation and future work are presented                                                | Yes/No        |
| Reference format is consistent.                                                         | Yes/No        |

# Sign Copyright Form

The corresponding author signing the copyright form should match the corresponding author marked on the paper. Please fill out the red box in the attached copyright.

|                                                                                                                                                  |                                                                                                                                                                                       |                             |                                  |
|--------------------------------------------------------------------------------------------------------------------------------------------------|---------------------------------------------------------------------------------------------------------------------------------------------------------------------------------------|-----------------------------|----------------------------------|
| Proposed Title of the Contribution:                                                                                                              | <div>Click here to enter text.</div>                                                                                                                                                  | <b>Paper title</b>          | (the 'Contribution')             |
| Series: The Contribution may be published in the following series                                                                                | A Springer Nature Computer Science book series (CCIS, LNAI, LNBI, LNBIP or LNCS)                                                                                                      |                             |                                  |
| Author(s) Full Name(s):                                                                                                                          | <div>Click here to enter text.</div>                                                                                                                                                  | <b>All authors</b>          | (the 'Author')                   |
| <i>When Author is more than one person the expression "Author" as used in this Agreement will apply collectively unless otherwise indicated.</i> |                                                                                                                                                                                       |                             |                                  |
| Corresponding Author Name:                                                                                                                       | <div>Click here to enter text.</div>                                                                                                                                                  | <b>Corresponding author</b> |                                  |
| Instructions for Authors                                                                                                                         | <a href="https://resource-cms.springernature.com/springer-cms/rest/v1/content/19242230/data/">https://resource-cms.springernature.com/springer-cms/rest/v1/content/19242230/data/</a> |                             | (the 'Instructions for Authors') |
| Signed for and on behalf of the Author:                                                                                                          | Print Name:                                                                                                                                                                           | Date:                       |                                  |
| <div></div>                                                                                                                                      | <div></div>                                                                                                                                                                           | <div></div>                 |                                  |
| Address:                                                                                                                                         |                                                                                                                                                                                       |                             |                                  |
| Email:                                                                                                                                           |                                                                                                                                                                                       |                             |                                  |

# Thanks for your great contributions to MICCAI FLARE!

## Looking forward to your submissions.

<https://openreview.net/group?id=MICCAI.org/2023/FLARE>

**Paper submission should include**

- **Your paper (pdf,  $\geq 8$  pages)**
- **Supplementary (zip, include copyright file and latex file)**



The screenshot shows the OpenReview submission interface. It has two main sections for file uploads. The first section is titled '\* PDF' and 'Paper PDF' in red. It instructs the user to 'Upload a PDF file that ends with .pdf' and shows a file selection button labeled 'Choose file' with the text 'No file chosen' and a close button 'x'. The second section is titled 'Supplementary Material' and 'Zip of copyright and latex file' in red. It provides instructions: 'Supplementary material (e.g. code or video). All supplementary material must be self-contained and zipped into a single file.' It also shows a file selection button labeled 'Choose file' with the text 'No file chosen' and a close button 'x'.

**Files inside the zip**  
**Teamname.zip**

- **paper.tex**
- **paper.pdf**
- **copyright.pdf** (signed)
- **ref.bib**
- **imgs**
- **llncls.cls**
- **splncls04.bst**
